# Supplementary material for: Genetic and genomic analysis of Belgian Blue’s susceptibility for psoroptic mange
Source: Springer Nature journal article supplement (doi:10.1186/s12711-024-00921-7), 2024-07-05
Supplement: MOESM1 [file 12711_2024_921_MOESM1_ESM.pdf]

Additional file 1 Figure S1

Score 1

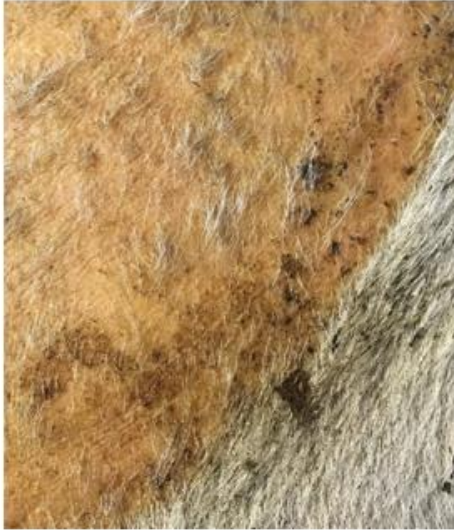

Score 2

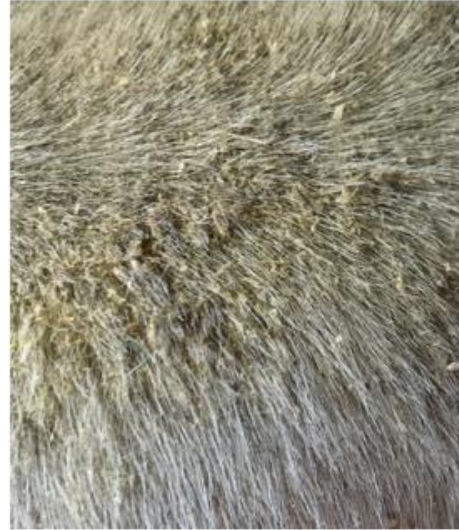

Score 3

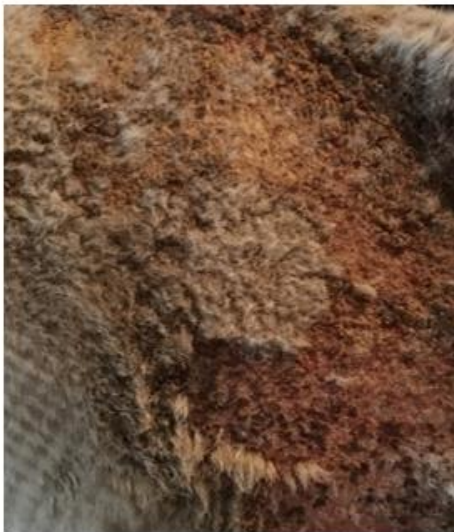

Score 4

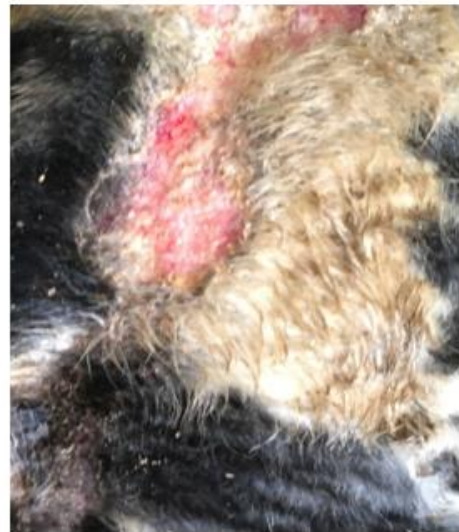

Four types of psoroptic mange lesions in Belgian Blue cattle, ranging from score 1: healing/healed lesions, to score 4: the most severe lesions with wound exudate and crusts.
