# Supplementary material for: Genetic and genomic analysis of Belgian Blue’s susceptibility for psoroptic mange
Source: Springer Nature journal article supplement (doi:10.1186/s12711-024-00921-7), 2024-07-05
Supplement: MOESM3 [file 12711_2024_921_MOESM3_ESM.pdf]

## Additional file 3 Figure S2

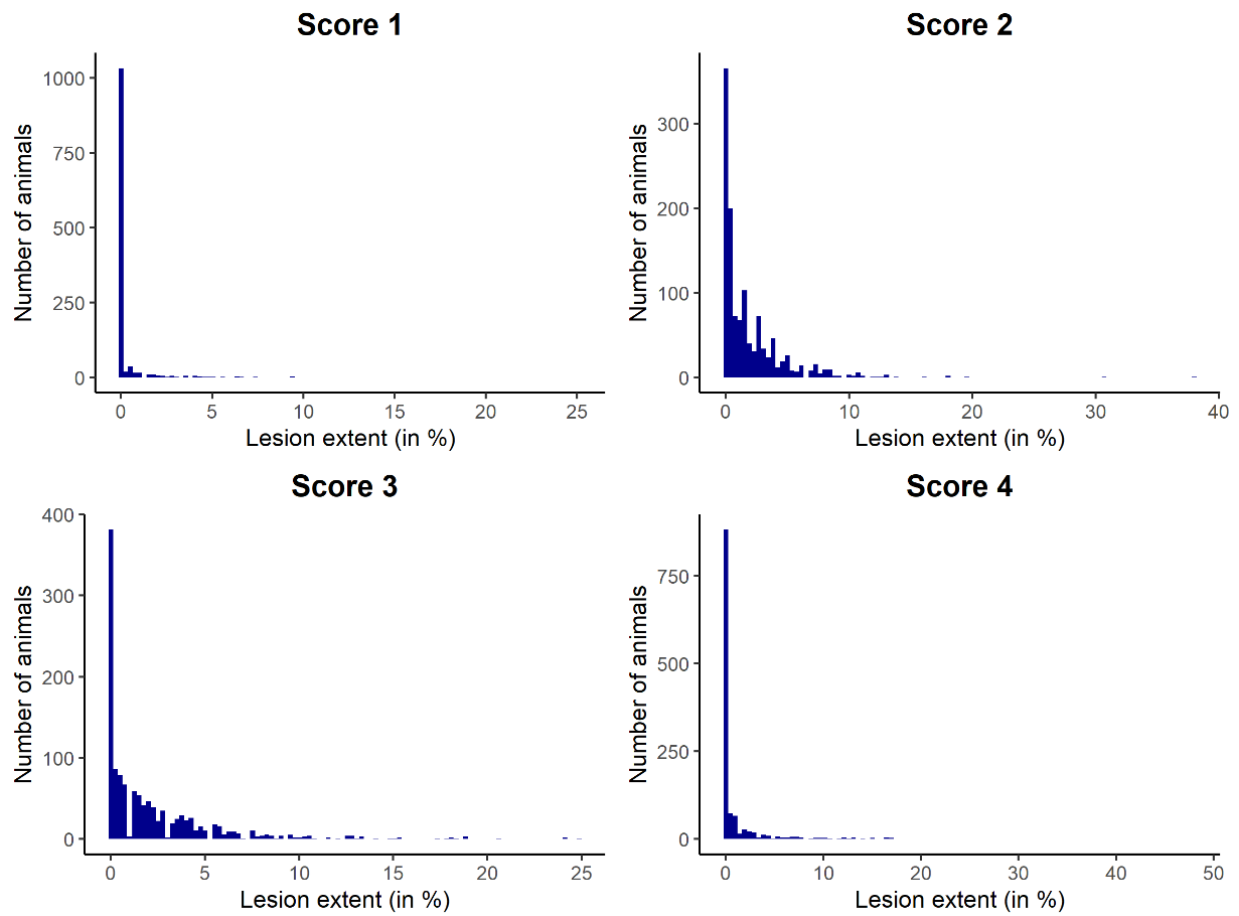

Histograms of the four different lesion scores of 1306 phenotyped Belgian Blue cattle. These detailed lesion scores were only given in Project 2 and lesion extent is expressed as percentage of body coverage.
