# Supplementary material for: Genetic and genomic analysis of Belgian Blue’s susceptibility for psoroptic mange
Source: Springer Nature journal article supplement (doi:10.1186/s12711-024-00921-7), 2024-07-05
Supplement: MOESM4 [file 12711_2024_921_MOESM4_ESM.pdf]

Additional file 4 Figure S3

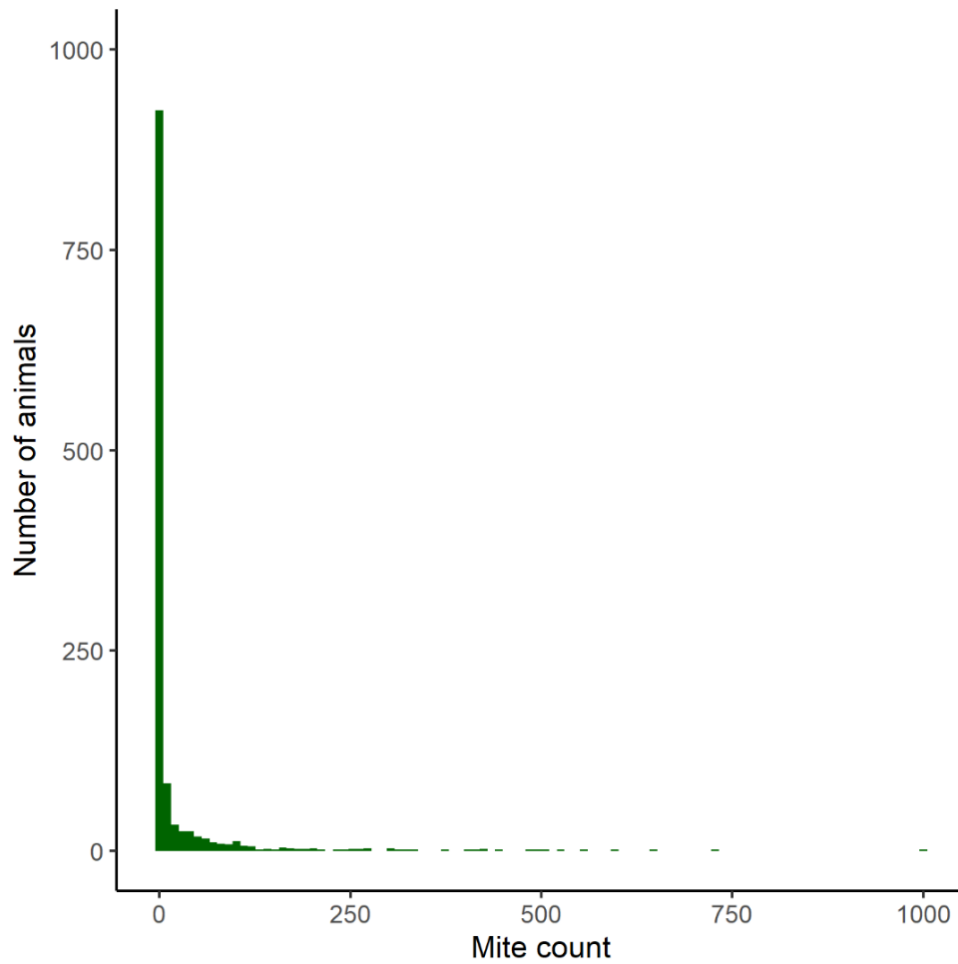

Histogram of mite count for Belgian Blue cattle phenotyped in project 2 (n= 1306) in a skin scraping of 12 cm<sup>2</sup> at the predilection sites for *P. ovis*. For one animal, mite count was topped at 1000 live *P. ovis* mites.
