# Supplementary material for: Genetic and genomic analysis of Belgian Blue’s susceptibility for psoroptic mange
Source: Springer Nature journal article supplement (doi:10.1186/s12711-024-00921-7), 2024-07-05
Supplement: MOESM5 [file 12711_2024_921_MOESM5_ESM.pdf]

## Additional file 5 Figure S4

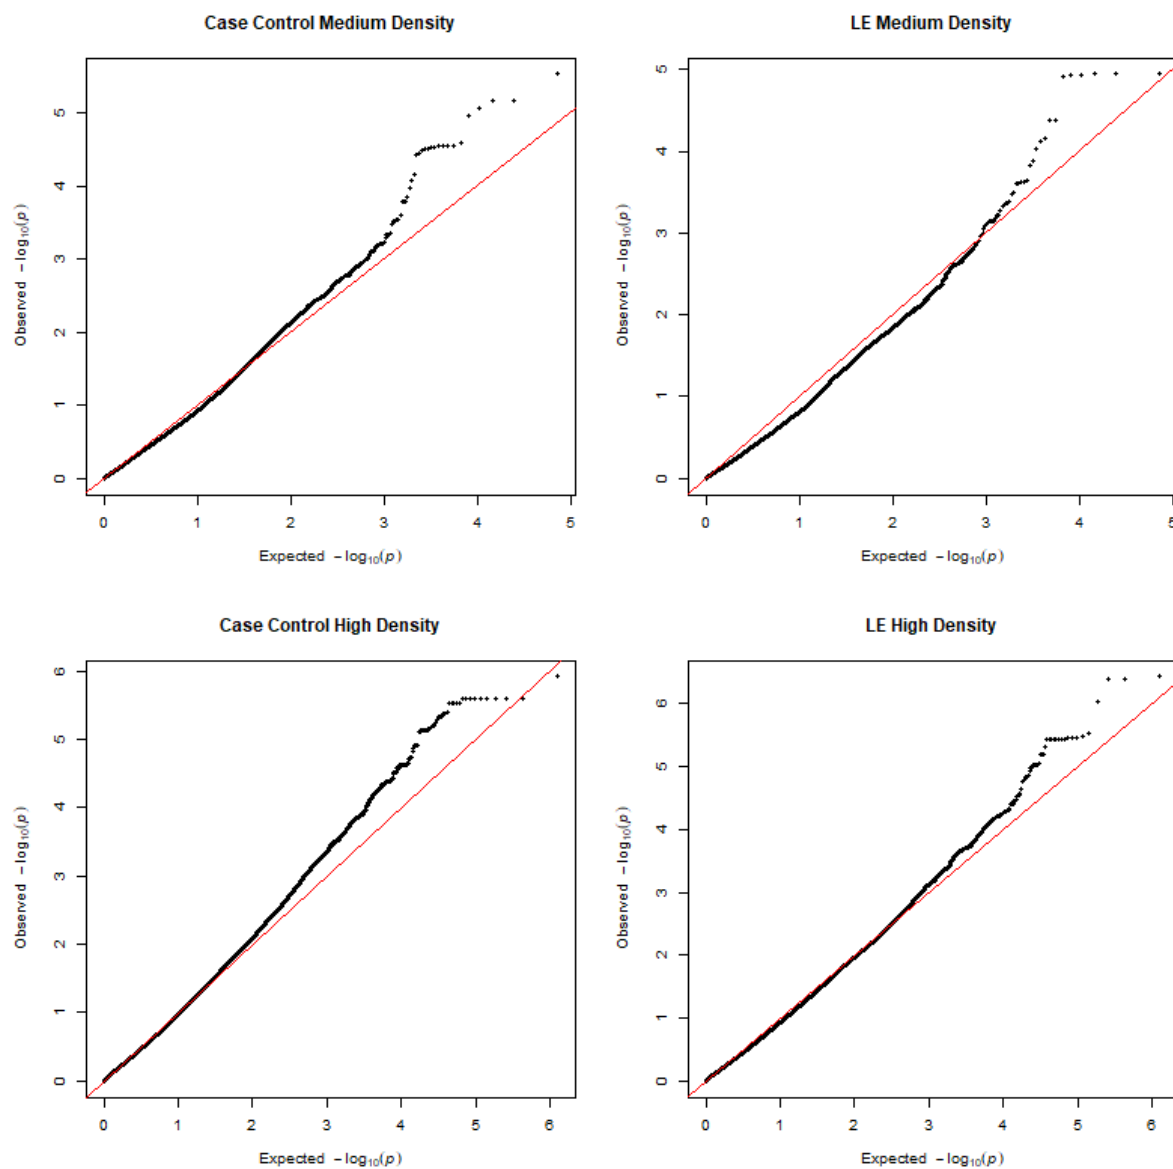

QQ-plots of the four haplotype-based GWAS for mange susceptibility in Belgian Blue. Top left shows the case-control approach on the medium density dataset (29,010 SNPs), top right shows the quantitative (lesion extent, LE) approach on medium density, bottom left the case-control approach on the high density dataset (633,512 SNPs) and bottom right the quantitative analysis on high density.
