# Supplementary material for: Genetic and genomic analysis of Belgian Blue’s susceptibility for psoroptic mange
Source: Springer Nature journal article supplement (doi:10.1186/s12711-024-00921-7), 2024-07-05
Supplement: MOESM6 [file 12711_2024_921_MOESM6_ESM.pdf]

Additional file 6 Figure S5

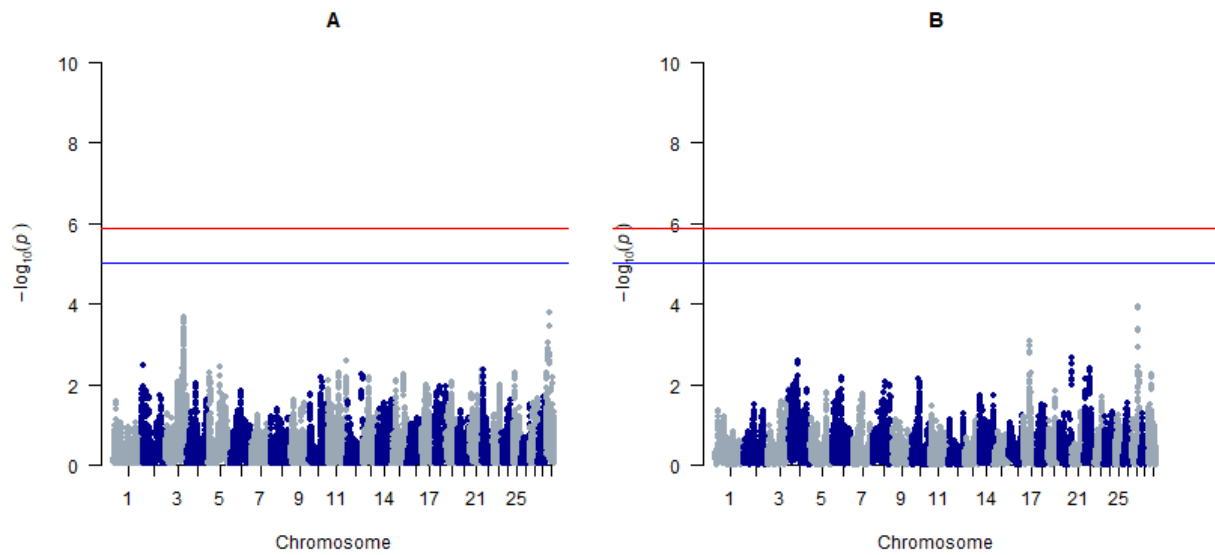

Manhattan plots for severe lesion extent (A) and mite count (B) on the medium density dataset (29,010 SNPs).
